# Supplementary material
Source: Springer Nature journal article supplement (https://www.springermedizin.de/resource/supplementary/12985_2010_1050_MOESM4_ESM.pdf/9609034)
Supplement: MOESM4 [file 9609034]

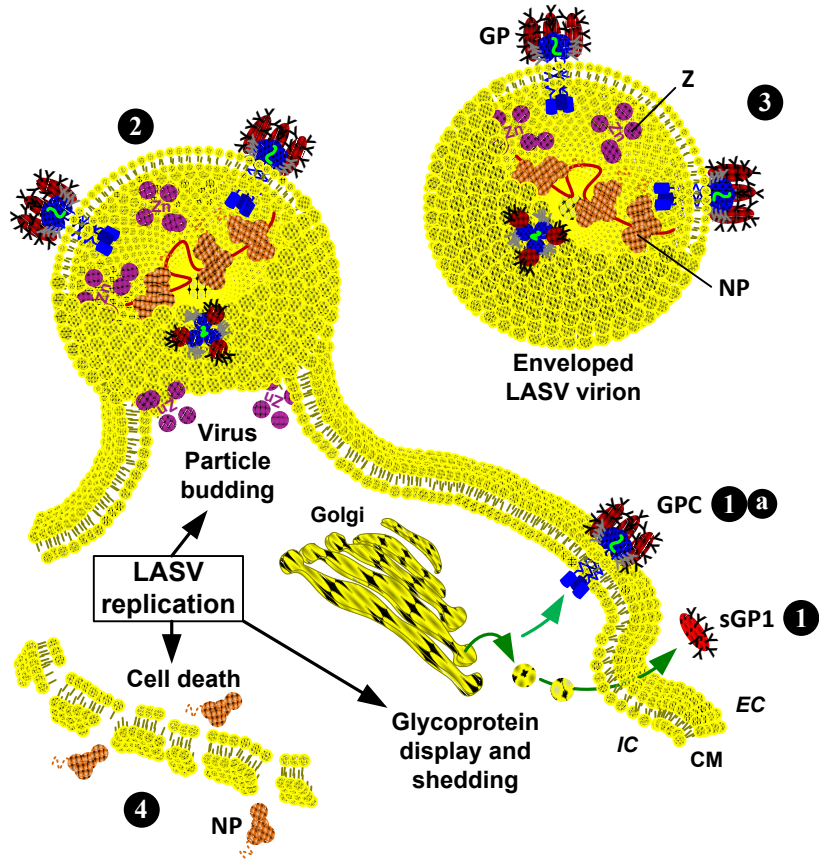

**Legend:**

|                                                                  |          |
|------------------------------------------------------------------|----------|
| signal peptide (SP)                                              |          |
| sGP1                                                             |          |
| NP                                                               |          |
| Z matrix protein                                                 |          |
| arenaviral GP spike in hypothetical prefusion state - GPC (+CHO) |          |
| viral RNA segment                                                |          |
| Ribonucleoprotein (RNP) complex                                  |          |
| secretory vesicle                                                |          |
| cell membrane (CM)                                               |          |
| N-linked glycosylation                                           | <b>Y</b> |
